# Supplementary material for: Membrane compression by synaptic vesicle exocytosis triggers ultrafast endocytosis
Source: PubMed Central journal article supplement (PMC10199930; doi:10.1038/s41467-023-38595-2), 2023-05-20
Supplement: 41467_2023_38595_MOESM1_ESM.pdf [file 41467_2023_38595_MOESM1_ESM.pdf]

a

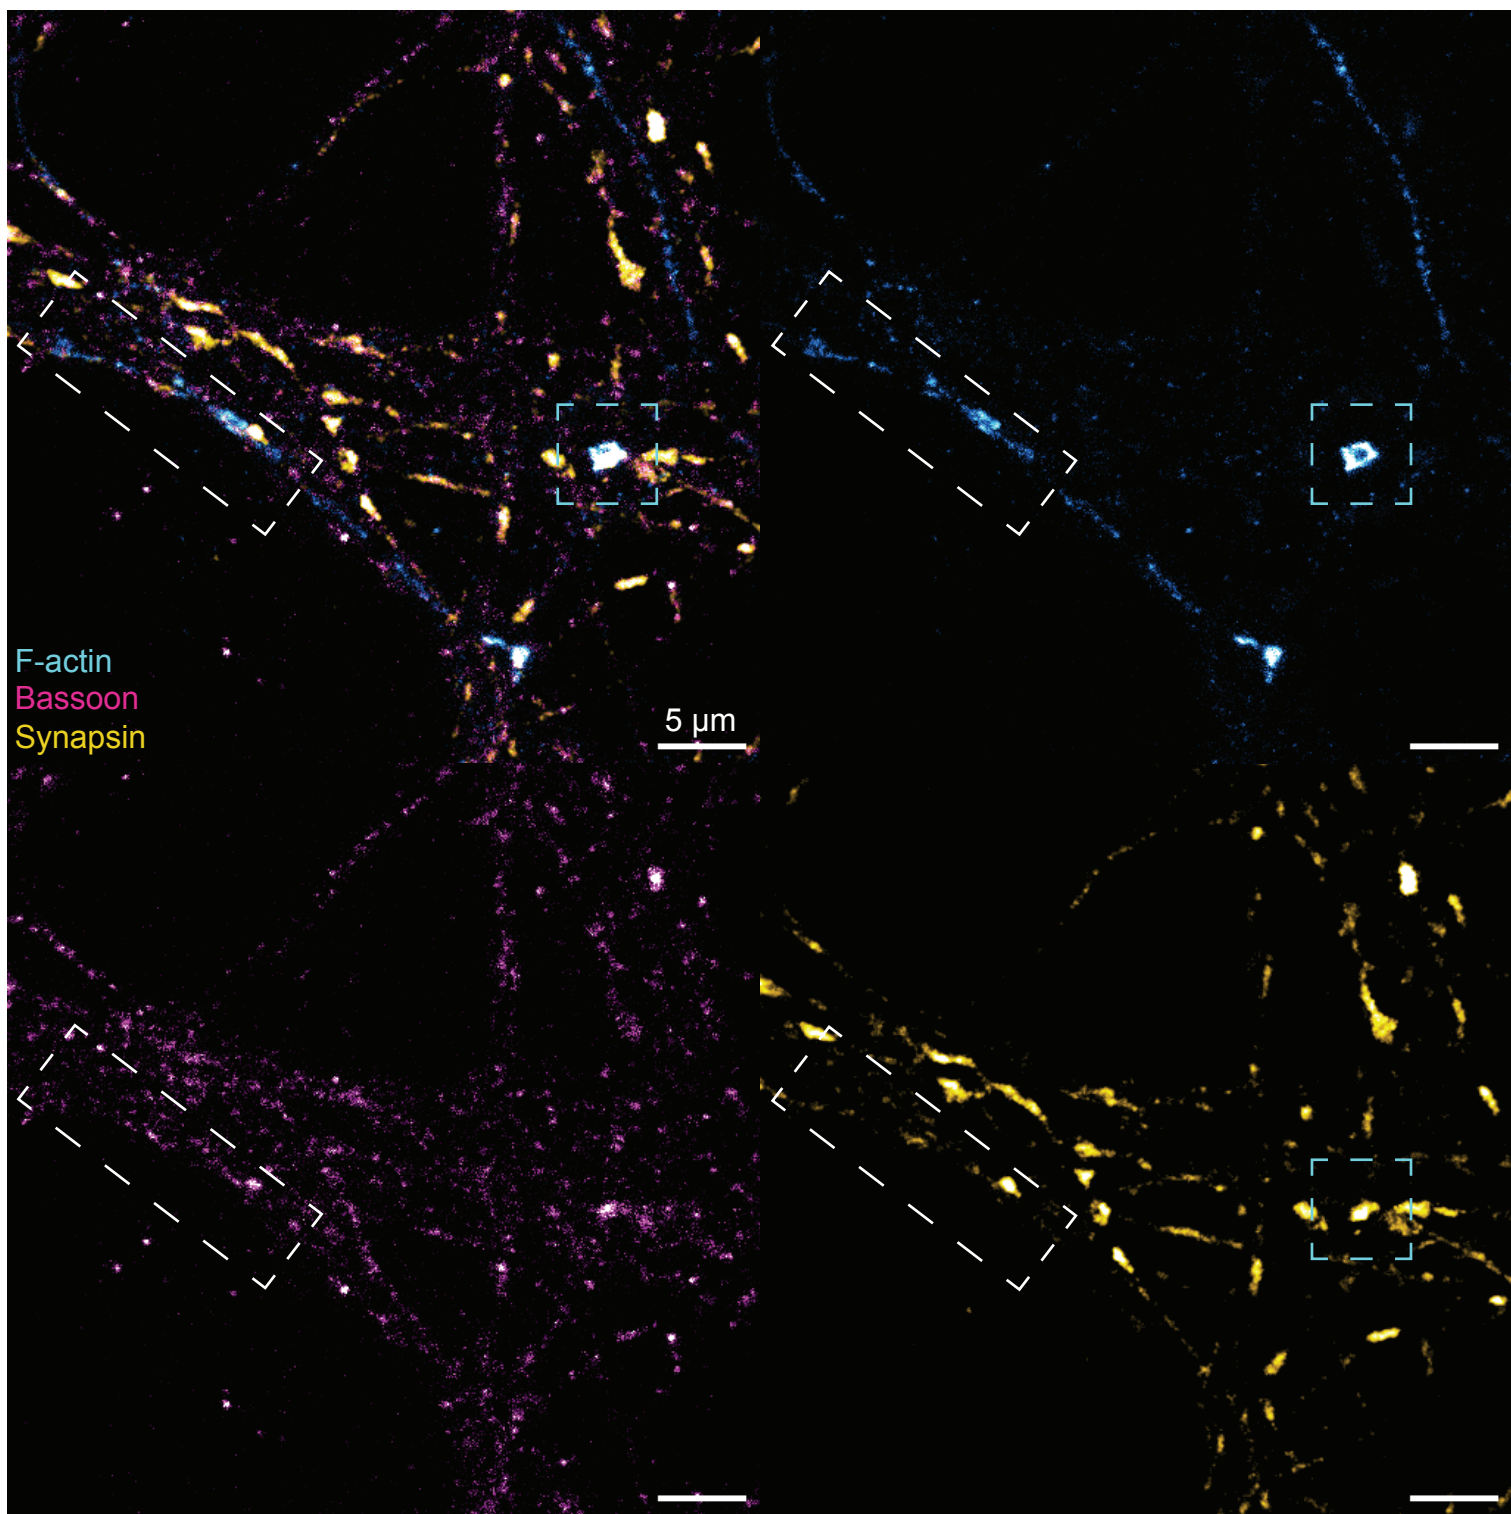

b

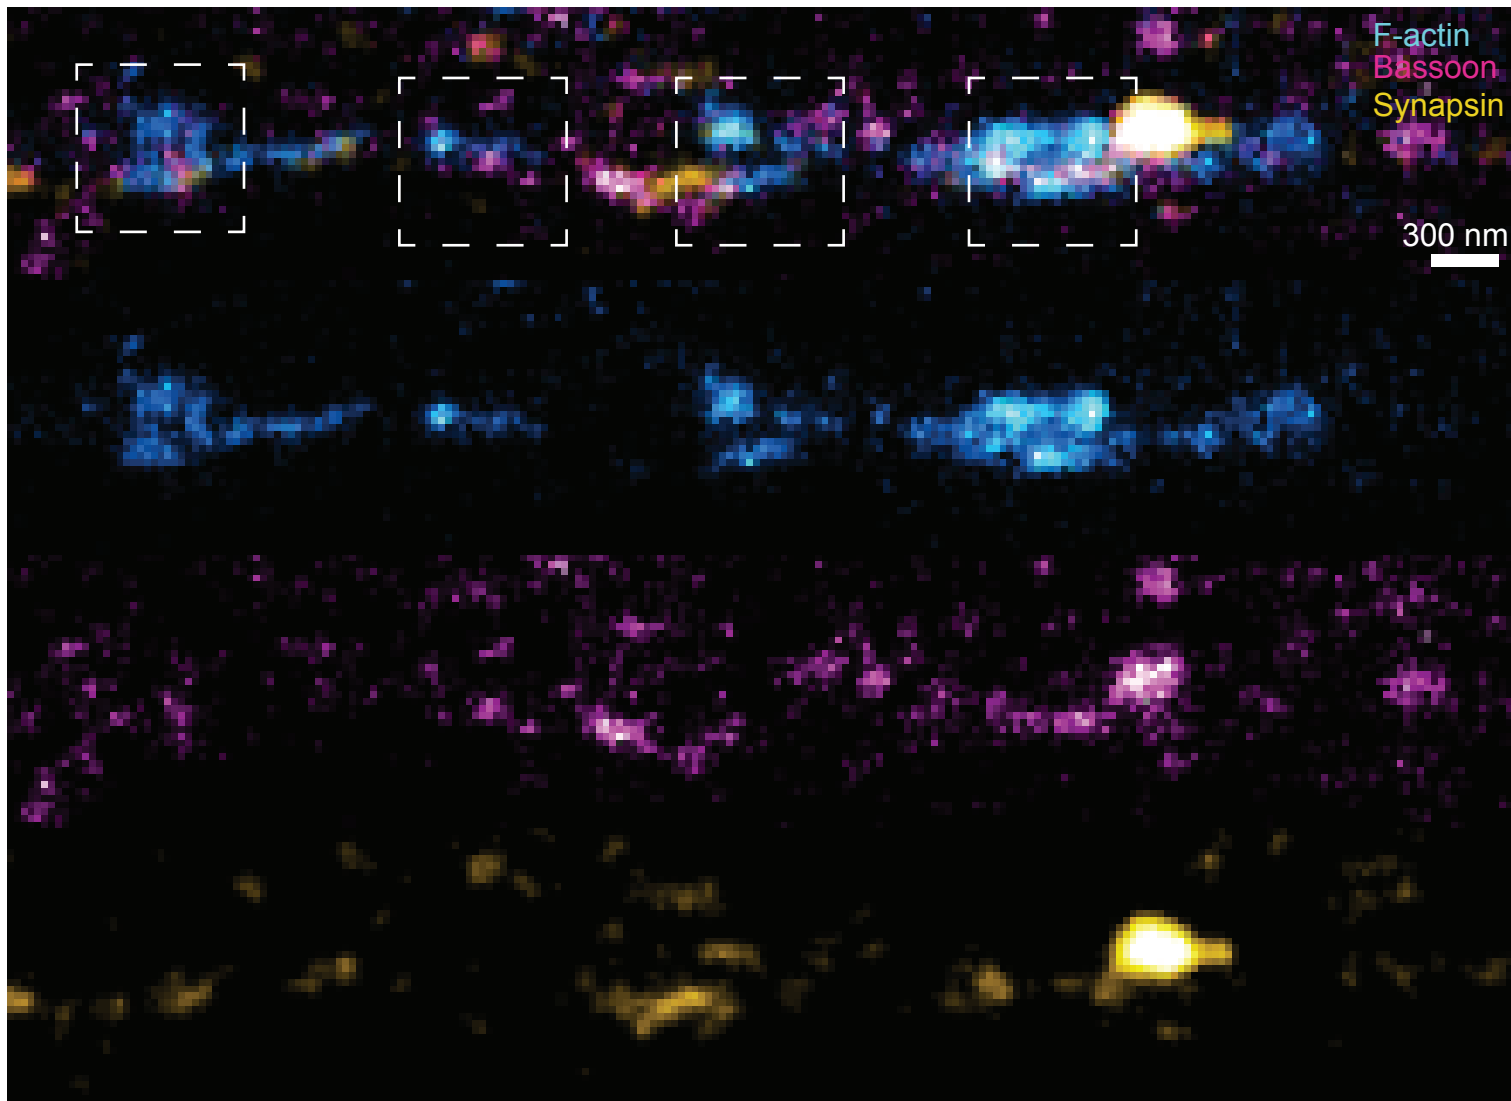

### **Supplementary Figure 1.**

a. Enlarged field of view of an EGFP-UtrCH (cyan) expressing neuron visualized by 3D gSTED. Image is max projected. Neurons are co-stained with Bassoon (magenta) and Synapsin (yellow). The staining procedure is as described in Fig.1. A composite image is followed by separated channels. The cyan dashed-line box contains the representative presynapse used for Fig.1. The white dashed-line box contains a typical axon.

b. Enlarged view of the axon contained within the dashed-line box in a. Multiple actin ring containing boutons and some partial ring containing boutons are shown, emphasized by white dashed-line boxes. A composite image is followed by separated channels.

a

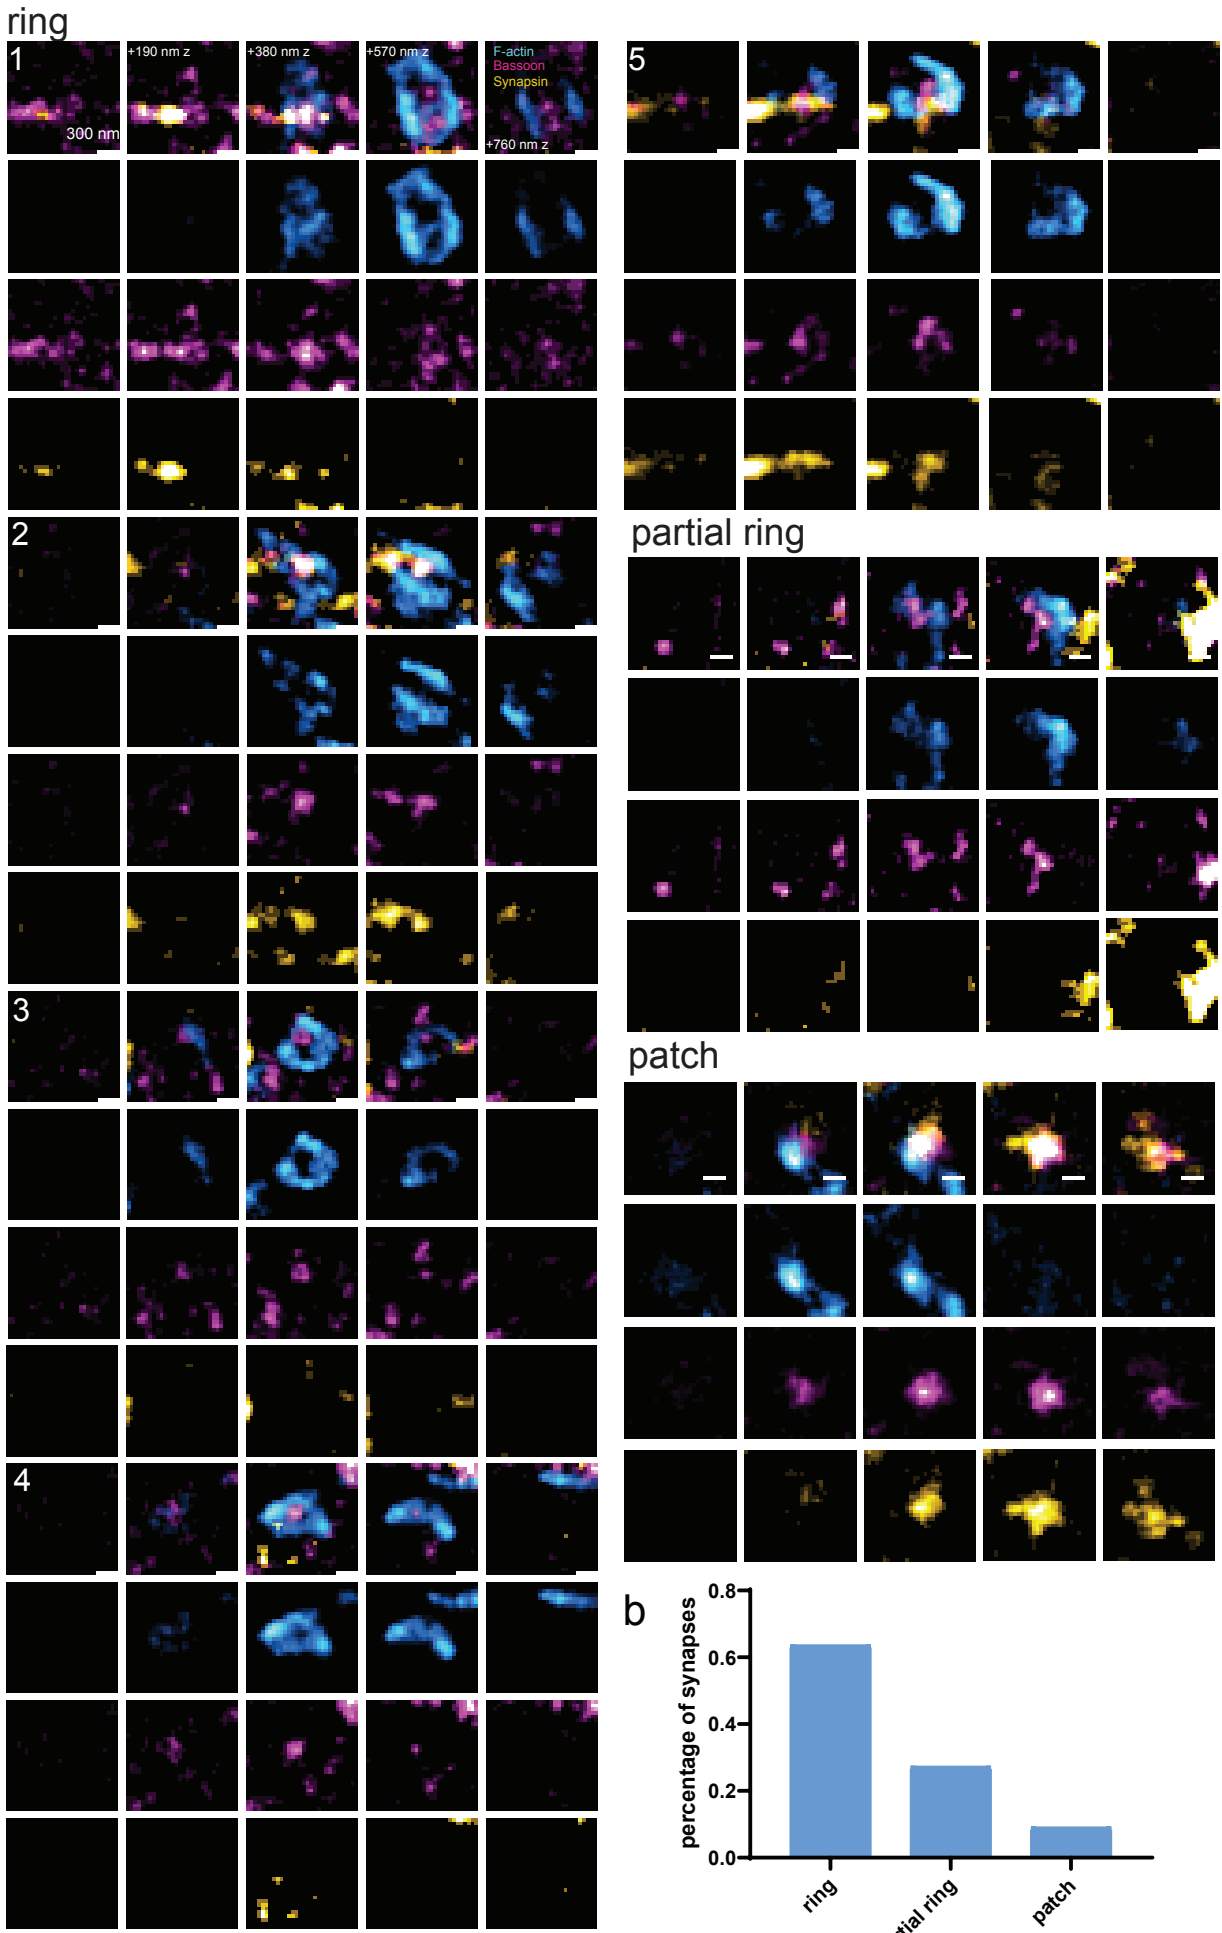

c

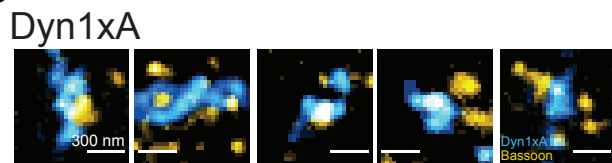

d

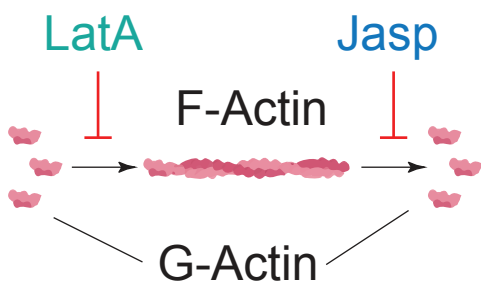

e

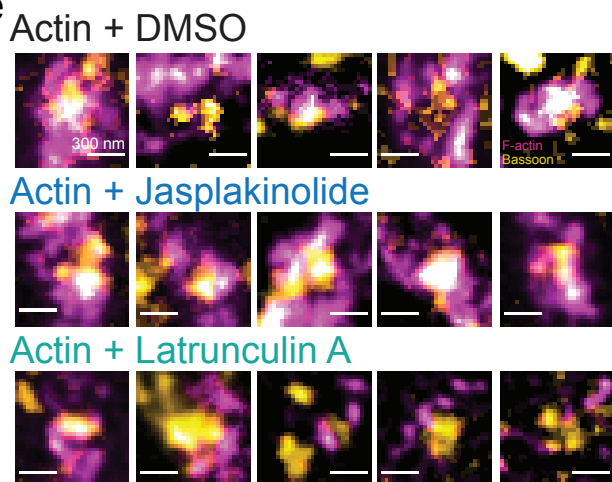

## Supplementary Figure 2

- a. Additional example 3D gSTED micrographs showing the localization of filamentous actin relative to the active zone and reserve pool vesicle cluster in neurons. The active zone is marked by anti-Bassoon antibody and its secondary antibody, the reserve pool vesicle cluster is marked by anti-Synapsin antibody and its secondary antibody. Composite images of synapses are shown above the corresponding three individual channels. Five ring-like actin distributions are shown.
- b. Percentage of synapses containing ring-like actin (64%), partial actin rings (27%), or actin patches (9%). Distribution from 33 synapses (n) across 2 cultures (N) reconstructed by 3D gSTED.
- c. Example 2D STED micrographs showing the localization of Dynamin 1xA (Dyn1xA) relative to the active zone.
- d. Schematic of Latrunculin A (LatA) and Jasplakinolide (Jasp) effects on F-actin filaments. Lat A sequesters actin monomers (Globular-actin, G-actin) to affect the rate of polymerization, while Jasp stabilizes F-actin.
- e. Additional example 2D STED micrographs showing the localization of filamentous actin (F-actin) relative to the active zone in neurons treated with DMSO (control), Latrunculin A (Lat A), and Jasplakinolide (Jasp). The active zone is marked by anti-Bassoon antibody and its secondary antibody. (bottom) Effect on actin filaments (F-actin) by Lat A or Jasp treatment.

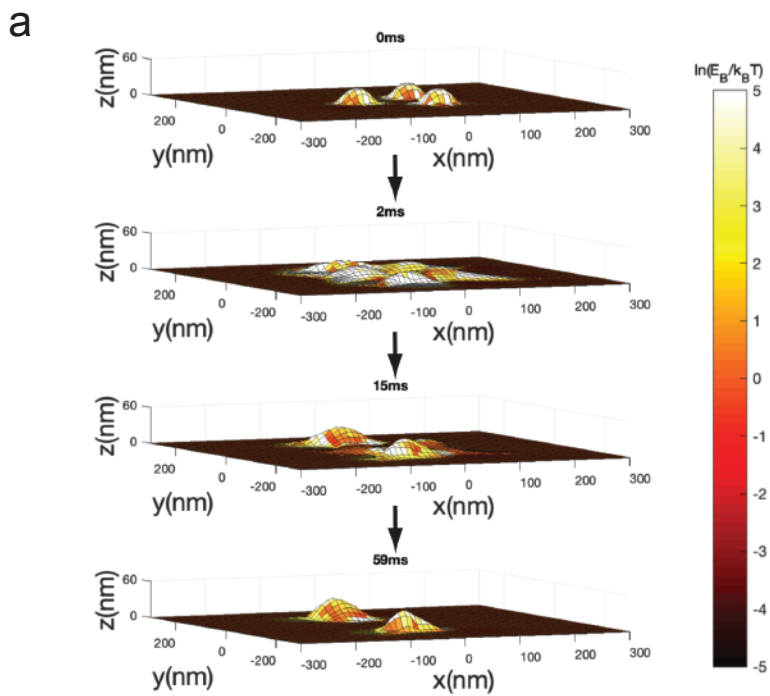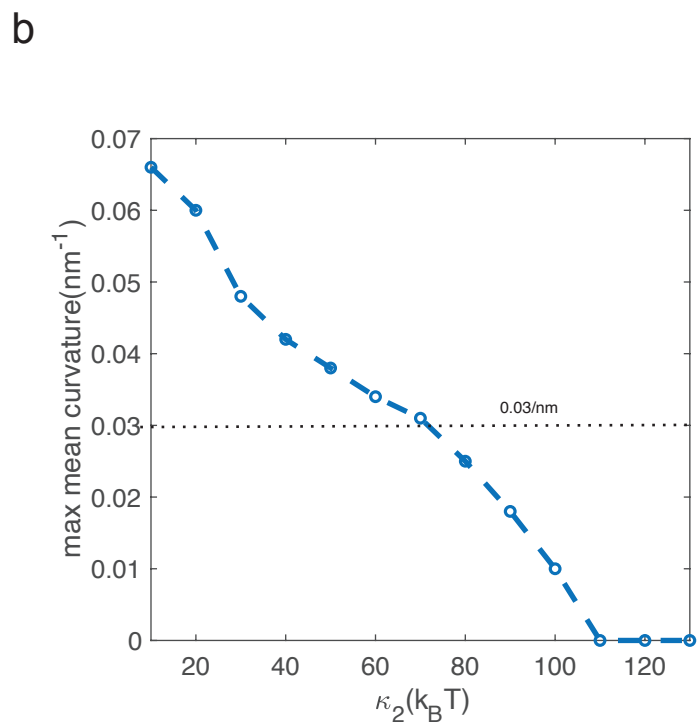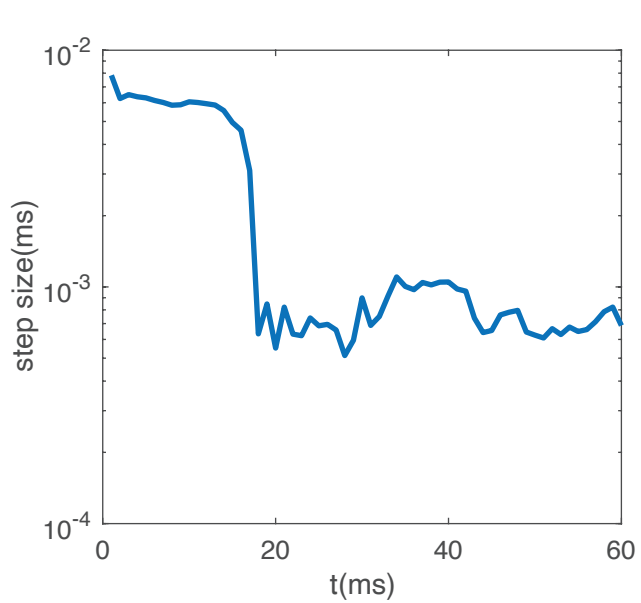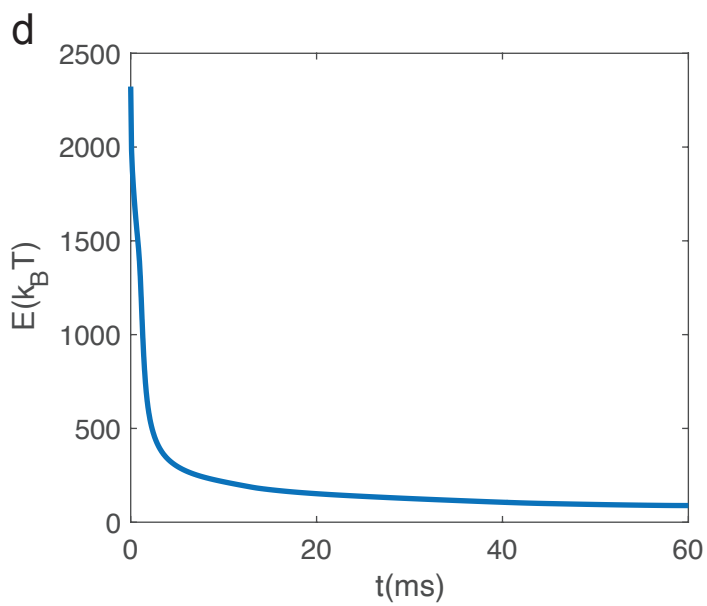

### Supplementary Figure 3.

- a. Snapshots from model simulation showing the spatial-temporal changes in the bending energy ( $E_B$ ) of the membrane over time. The model parameter and setup correspond to the same condition as the nominal case in Fig. 1e. In the colormap, the bending energy of the local membrane (in the unit of  $k_B T$ ) is plotted in the natural log-scale to optimally discern the spatial-temporal changes.
- b. Model results showing that the maximal mean curvature of the resulting endocytic pits decreases with the bending modulus of the active zone and endocytic zone,  $\kappa_2$ , while keeping all the other parameters and the geometry of fusing vesicles as those in the nominal case in Fig. 1e.
- c. A representative trajectory showing the evolution of the adaptive simulation timestep over time in the numerical simulation of the nominal case in Fig. 1e.
- d. Model result showing that the total energy of the system is minimized over time during the simulation. Here, the model parameter and setup correspond to the same condition as the nominal case in Fig. 1e.

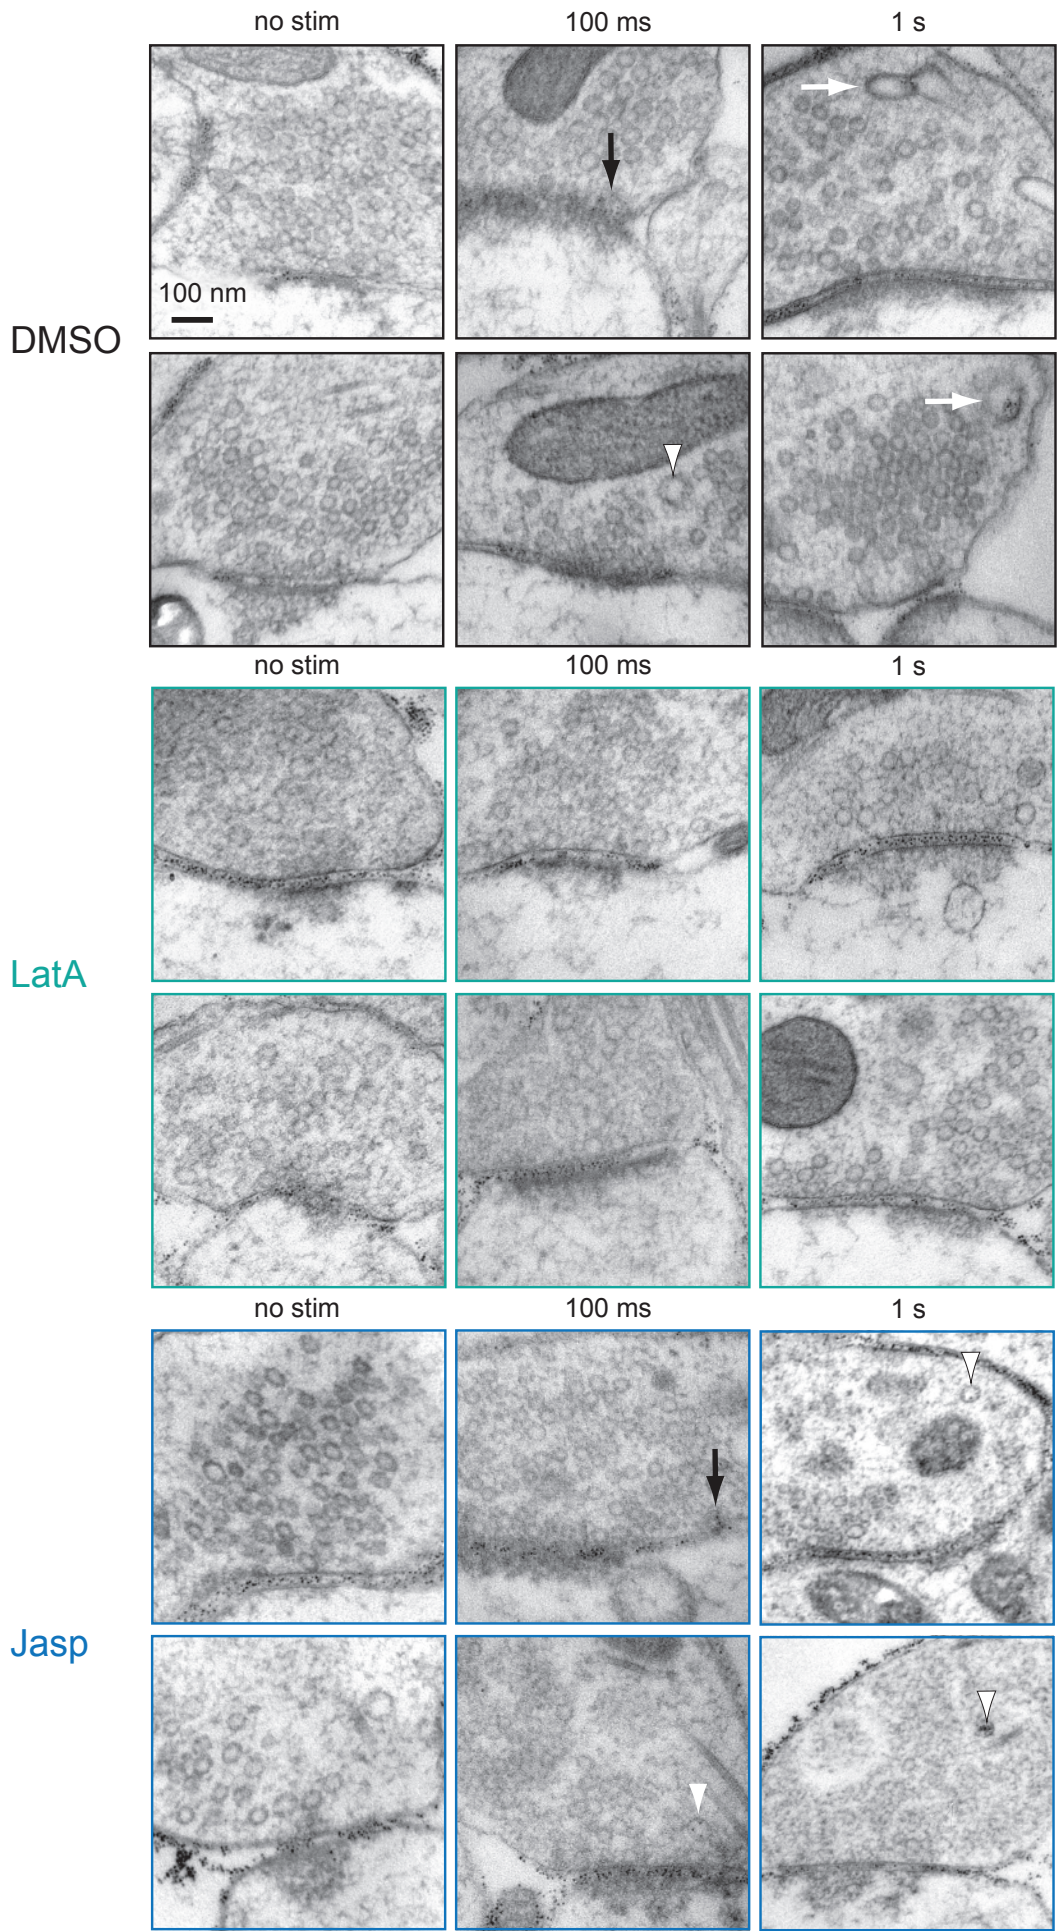

#### **Supplementary Figure 4.**

Additional electron micrographs showing ChetaTC-expressing wild-type neurons, treated with 0.1% DMSO, 10  $\mu$ M Latrunculin A (LatA), and 100 nM Jasplakinolide. The left panel shows unstimulated conditions, while the right panel shows 100 ms after single stimulus (10 ms light pulse, 37 °C, 4 mM external  $\text{Ca}^{2+}$ ). Black arrow: endocytic pit. White arrowhead: ferritin-positive endocytic vesicle. White arrow: ferritin-positive endosomes. N=2 cultures, n=200.



**a**

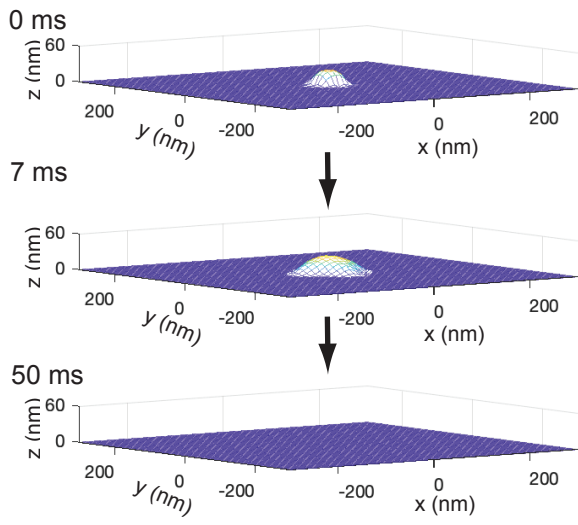

### **Supplementary Figure 5.**

a. Snapshots from simulation, showing the evolution of membrane shape within the active zone upon a single vesicle fusion. As long as the membrane area is conserved, the fusing vesicle cannot flatten out completely. However, when the membrane area conservation was turned off at 7 ms, the exocytic pit fully collapse into the active zone.

**a** wild type, 1.2 mM Ca<sup>2+</sup>

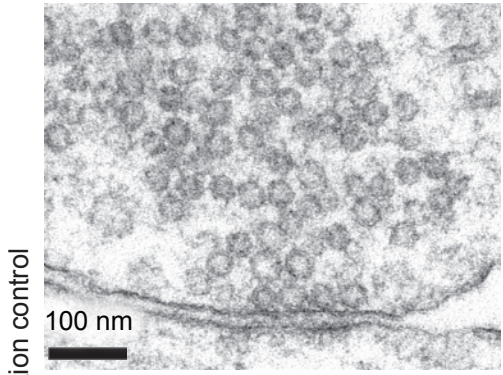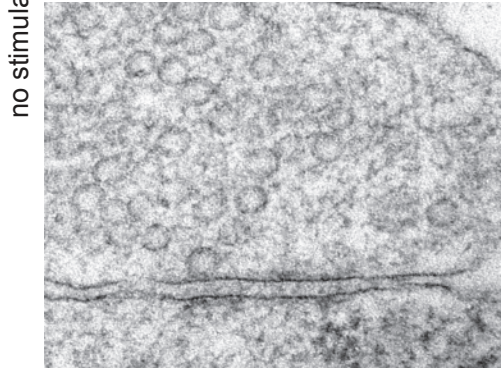

**b** Doc2α +/+

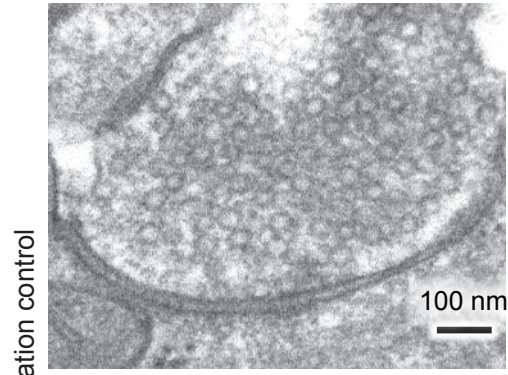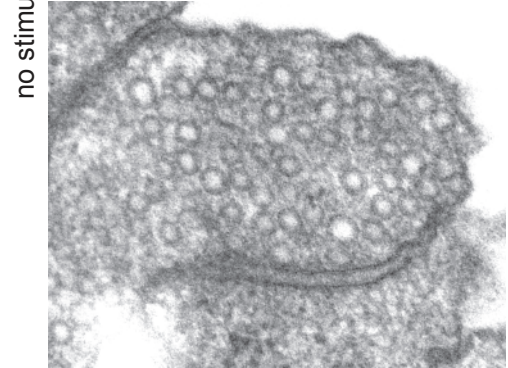

Doc2α -/-

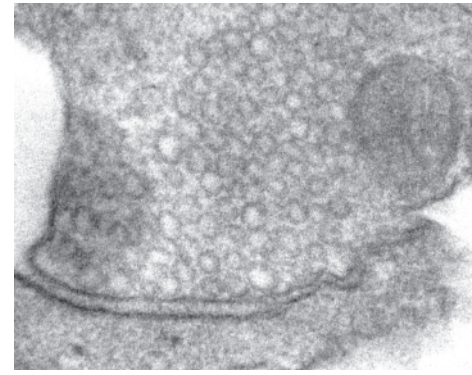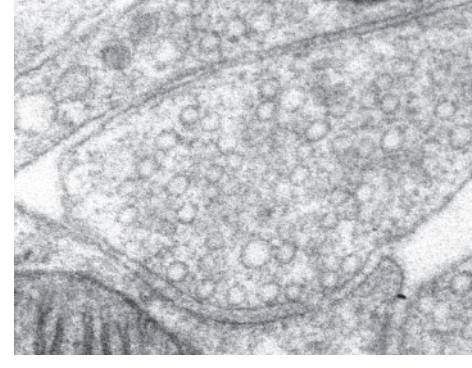

wild type, 1.2 mM Ca<sup>2+</sup>

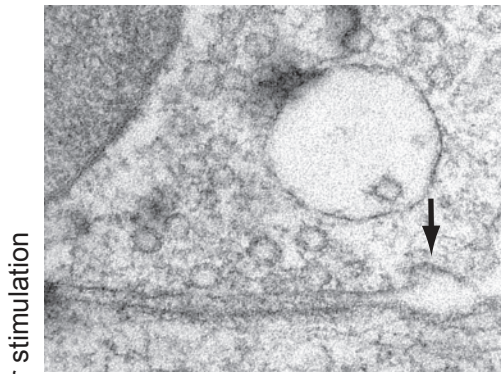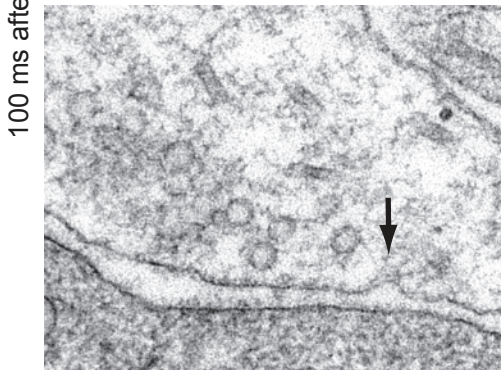

Doc2α +/+

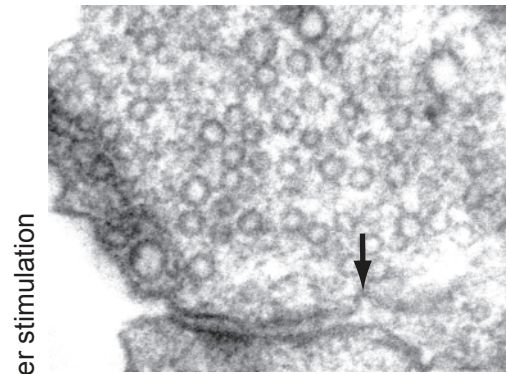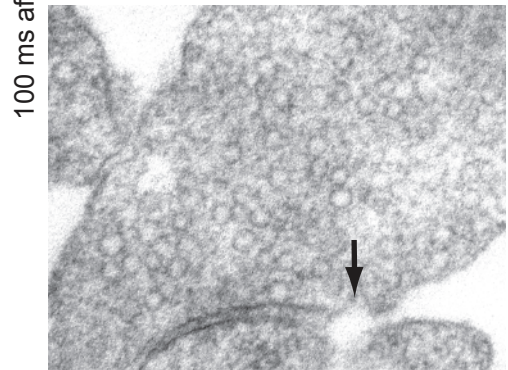

Doc2α -/-

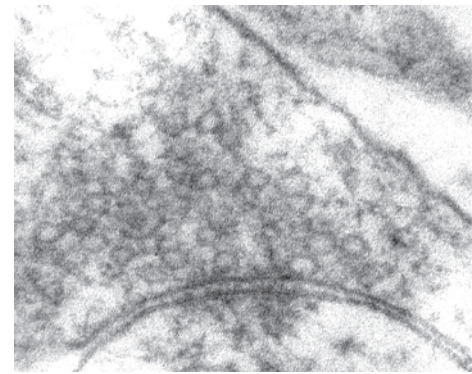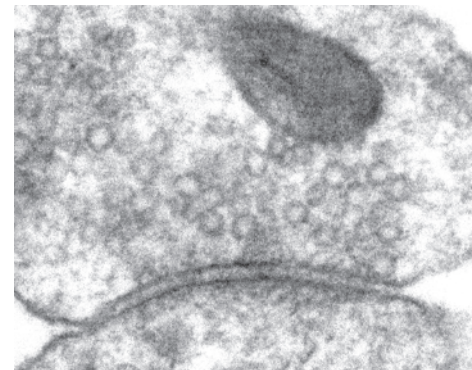

**Supplementary Figure 6.**

a. Additional example micrographs showing wild-type synapses unstimulated (left) or stimulated with electric field for 1 ms and frozen 100 ms later (right). The external calcium concentration is 1.2 mM. Black arrow: endocytic pit. N=2 cultures, n=200.

b. Additional example micrographs showing wild-type and Doc2 $\alpha$  knockout unstimulated or stimulated with electric field for 1 ms and frozen 100 ms later. Black arrow: endocytic pit. N=2 cultures, n=200.

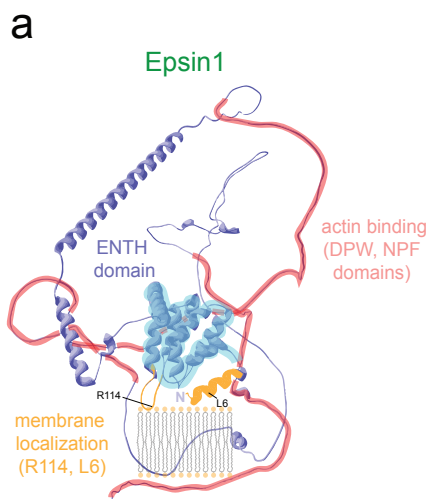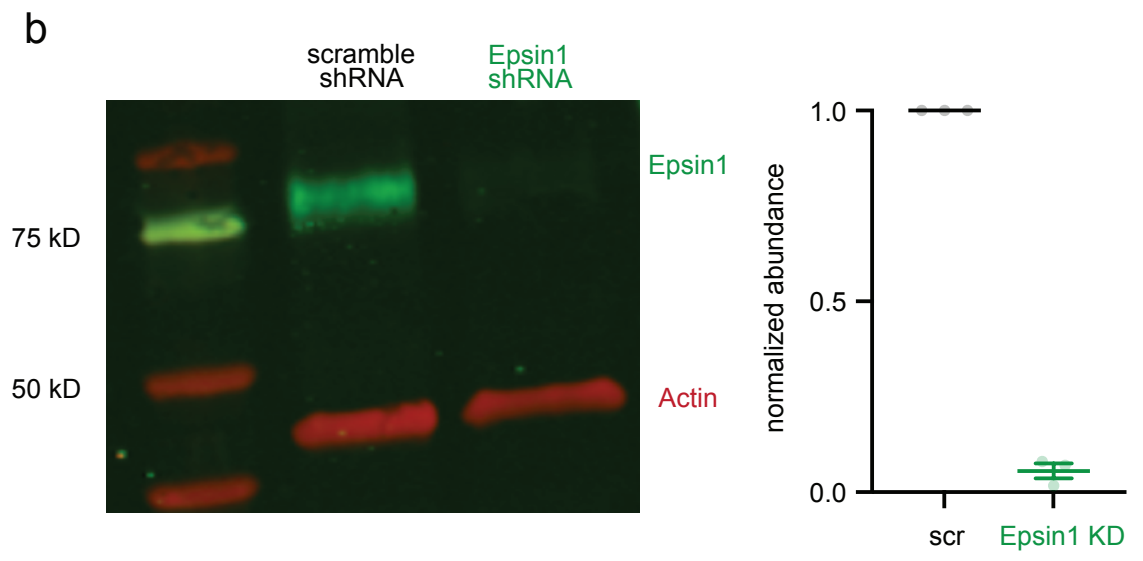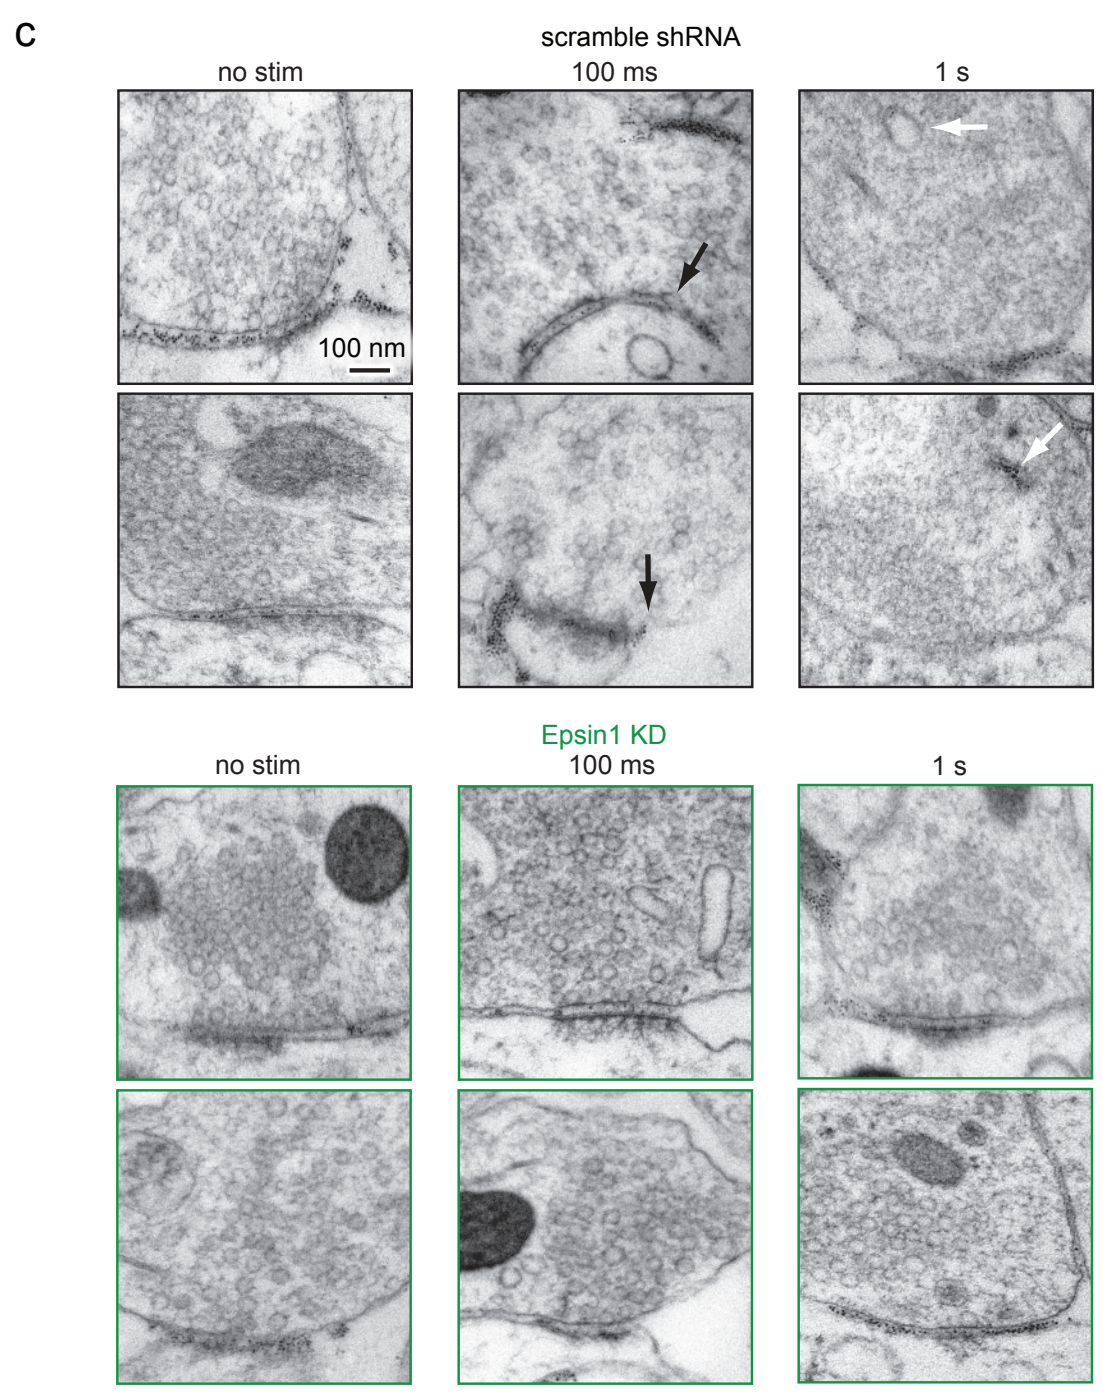

### Supplementary Figure 7.

a. A schematic showing the protein structural elements of Epsin1. Epsin1 contains ENTH domain, NPF and DPW. The C-terminal domain, marked light red, interacts with F-actin, while the ENTH domain, marked light blue, interacts with plasma membrane.

b. An example Western blot and a plot showing efficiency of Epsin1 knock-down (KD). In each case, Epsin1 signal intensity is normalized by the amount of actin, and then, the abundance of Epsin1 is calculated based on the normalized intensity in the scramble (scr) shRNA control. The mean and SEM are shown. Dot: one culture. N=3 cultures, \*\*\*p<0.001.

c. Additional example electron micrographs showing wild-type and Epsin1 KD s unstimulated or stimulated with a single electrical pulse (1 ms) and frozen 100 ms or 1 s later. Black arrow: endocytic pit. White arrow: ferritin-positive endosomes.

**Supplementary Table 1: Model Parameters used in this study.**

| <b>Model Parameter</b>                                            | <b>Physical Range</b>                                                                                          | <b>Nominal Value used in the model</b>                        |
|-------------------------------------------------------------------|----------------------------------------------------------------------------------------------------------------|---------------------------------------------------------------|
| Bending modulus of post-fusion vesicle, $\kappa_1$                | $100 - 400 k_B T$<br>( $\sim 4.3 \times 10^{-19} \text{ J} - 1.7 \times 10^{-18} \text{ J}$ ) <sup>31,33</sup> | $300 k_B T$<br>( $\sim 1.3 \times 10^{-18} \text{ J}$ )       |
| Bending modulus of the active zone and endocytic zone, $\kappa_2$ | $10 - 100 k_B T$<br>( $\sim 4.3 \times 10^{-20} \text{ J} - 4.3 \times 10^{-19} \text{ J}$ ) <sup>40,41</sup>  | $20 k_B T$<br>( $\sim 8.6 \times 10^{-20} \text{ J}$ )        |
| Bending modulus of the actin-enriched periactive zone, $\kappa_3$ | Same as $\kappa_1$ <sup>42-44</sup>                                                                            | $300 k_B T$<br>( $\sim 1.3 \times 10^{-18} \text{ J}$ )       |
| Osmotic pressure                                                  | $\sim 1 \text{ kPa}$ <sup>103</sup>                                                                            | 1 kPa                                                         |
| Effective viscous drag coefficient of membrane shape changes      | $\sim 2 \times 10^9 \text{ Pa} \cdot \text{s} \cdot \text{m}^{-1}$ <sup>104</sup>                              | $2 \times 10^9 \text{ Pa} \cdot \text{s} \cdot \text{m}^{-1}$ |

Note (\*): The temperature, T, is chosen to be 37°C.

**Supplementary Table 2:** A summary of statistical analysis used in this study.



**Fig. 1b distribution**

|                                     | DMSO    | Jasp    | LatA    | Dyn1xA |
|-------------------------------------|---------|---------|---------|--------|
| Test for normal distribution        |         |         |         |        |
| Anderson-Darling test               |         |         |         |        |
| A2*                                 | 0.4894  | 0.3809  | 0.3179  | 1.018  |
| P value                             | 0.1783  | 0.3423  | 0.4913  | 0.0071 |
| Passed normality test (alpha=0.05)? | Yes     | Yes     | Yes     | No     |
| P value summary                     | ns      | ns      | ns      | **     |
| D'Agostino & Pearson test           |         |         |         |        |
| K2                                  | 3.607   | 3.721   | 3.097   | 2.671  |
| P value                             | 0.1647  | 0.1556  | 0.2126  | 0.263  |
| Passed normality test (alpha=0.05)? | Yes     | Yes     | Yes     | Yes    |
| P value summary                     | ns      | ns      | ns      | ns     |
| Shapiro-Wilk test                   |         |         |         |        |
| W                                   | 0.8899  | 0.9075  | 0.9234  | 0.7993 |
| P value                             | 0.1175  | 0.1982  | 0.315   | 0.0092 |
| Passed normality test (alpha=0.05)? | Yes     | Yes     | Yes     | No     |
| P value summary                     | ns      | ns      | ns      | **     |
| Kolmogorov-Smirnov test             |         |         |         |        |
| KS distance                         | 0.1736  | 0.141   | 0.1223  | 0.2417 |
| P value                             | >0.1000 | >0.1000 | >0.1000 | 0.0511 |
| Passed normality test (alpha=0.05)? | Yes     | Yes     | Yes     | Yes    |
| P value summary                     | ns      | ns      | ns      | ns     |
| Number of values (n)                | 339     | 390     | 458     | 185    |
| Number of cultures (N)              | 3       | 3       | 3       | 2      |
| Minimum                             | -33.38  | -14.86  | -16.63  | -27.97 |
| 25% Percentile                      | 95.2    | 132.2   | 114.5   | 61.09  |
| Median                              | 169.4   | 218.4   | 212.5   | 114.1  |
| 75% Percentile                      | 262.9   | 326     | 349.8   | 167.7  |
| Maximum                             | 514     | 545.6   | 544.5   | 440.6  |
| Range                               | 547.3   | 560.5   | 561.1   | 468.5  |
| Mean                                | 187.4   | 233     | 234.4   | 122.1  |
| Std. Deviation                      | 122.4   | 131.7   | 141.9   | 89.97  |
| Std. Error of Mean                  | 6.647   | 6.668   | 6.631   | 6.615  |

| Dunn's multiple comparisons test | Mean rank diff. | Significant? | Summary | Adjusted P Value |
|----------------------------------|-----------------|--------------|---------|------------------|
| DMSO vs. Jasp                    | -131.3          | Yes          | ****    | <0.0001          |
| DMSO vs. LatA                    | -124.7          | Yes          | ****    | <0.0001          |
| DMSO vs. Dyn1xA                  | 208             | Yes          | ****    | <0.0001          |
| Jasp vs. LatA                    | 6.588           | No           | ns      | >0.9999          |
| Jasp vs. Dyn1xA                  | 339.3           | Yes          | ****    | <0.0001          |
| LatA vs. Dyn1xA                  | 332.7           | Yes          | ****    | <0.0001          |
|                                  |                 |              |         |                  |

**Fig. 1b intensity**

|                                     | DMSO    | Jasp    | LatA    |  |
|-------------------------------------|---------|---------|---------|--|
| Test for normal distribution        |         |         |         |  |
| Anderson-Darling test               |         |         |         |  |
| A2*                                 | 2.222   | 2.167   | 2.618   |  |
| P value                             | <0.0001 | <0.0001 | <0.0001 |  |
| Passed normality test (alpha=0.05)? | No      | No      | No      |  |
| P value summary                     | ****    | ****    | ****    |  |
| D'Agostino & Pearson test           |         |         |         |  |
| K2                                  | 4.986   | 5.498   | 11.76   |  |
| P value                             | 0.0826  | 0.064   | 0.0028  |  |
| Passed normality test (alpha=0.05)? | Yes     | Yes     | No      |  |
| P value summary                     | ns      | ns      | **      |  |
|                                     |         |         |         |  |
| Shapiro-Wilk test                   |         |         |         |  |
| W                                   | 0.7445  | 0.75    | 0.6975  |  |
| P value                             | 0.0001  | 0.0001  | <0.0001 |  |
| Passed normality test (alpha=0.05)? | No      | No      | No      |  |
| P value summary                     | ***     | ***     | ****    |  |
|                                     |         |         |         |  |
| Kolmogorov-Smirnov test             |         |         |         |  |
| KS distance                         | 0.2435  | 0.2688  | 0.2651  |  |
| P value                             | 0.0021  | 0.0004  | 0.0005  |  |
| Passed normality test (alpha=0.05)? | No      | No      | No      |  |
| P value summary                     | **      | ***     | ***     |  |
|                                     |         |         |         |  |
| Number of values (n)                | 134     | 179     | 233     |  |
| Number of cultures (N)              | 3       | 3       | 3       |  |
|                                     |         |         |         |  |
| Minimum                             | 0.5     | 2.416   | 0       |  |

|                                  |                 |              |         |                  |
|----------------------------------|-----------------|--------------|---------|------------------|
| 25% Percentile                   | 7.244           | 6.718        | 4.798   |                  |
| Median                           | 9.921           | 9.592        | 6.847   |                  |
| 75% Percentile                   | 14.51           | 14.24        | 11.06   |                  |
| Maximum                          | 34.02           | 40           | 32.9    |                  |
| Range                            | 33.52           | 37.59        | 32.9    |                  |
|                                  |                 |              |         |                  |
| Mean                             | 11.33           | 11.33        | 8.556   |                  |
| Std. Deviation                   | 5.647           | 6.298        | 5.588   |                  |
| Std. Error of Mean               | 0.4878          | 0.4707       | 0.3661  |                  |
|                                  |                 |              |         |                  |
| Kruskal-Wallis test              |                 |              |         |                  |
| Dunn's multiple comparisons test | Mean rank diff. | Significant? | Summary | Adjusted P Value |
| DMSO vs. Jasp                    | 7.691           | No           | ns      | >0.9999          |
| DMSO vs. LatA                    | 94.14           | Yes          | ****    | <0.0001          |
| Jasp vs. LatA                    | 86.45           | Yes          | ****    | <0.0001          |

**Fig. 2d** Kruskal-Wallis test with Dunn's multiple comparisons test

|      |         | N<br>(culture) | n<br>(synaptic<br>profiles) | mean    | sem      | p values<br>(against no<br>stim<br>control) |
|------|---------|----------------|-----------------------------|---------|----------|---------------------------------------------|
| DMSO | no stim | 2              | 200                         | 0.01    | 0.007053 |                                             |
|      | 100 ms  | 2              | 200                         | 0.105   | 0.02173  | 0.0002                                      |
| LatA | no stim | 2              | 200                         | 0       | 0        |                                             |
|      | 100 ms  | 2              | 200                         | 0.005   | 0.005    | >0.9999                                     |
| Jasp | no stim | 2              | 193                         | 0.00518 | 0.005181 |                                             |
|      | 100 ms  | 2              | 200                         | 0.17    | 0.02663  | <0.0001                                     |

| Dunn's<br>multiple<br>comparison<br>s test | Mean rank<br>diff. | Significa<br>nt? | Summar<br>y | Adjusted<br>P Value |
|--------------------------------------------|--------------------|------------------|-------------|---------------------|
| DMSO no<br>stim vs.<br>DMSO 100<br>ms      | -56.67             | Yes              | ***         | 0.0002              |
| DMSO no<br>stim vs.<br>LatA no<br>stim     | 5.965              | No               | ns          | >0.9999             |
| DMSO no<br>stim vs.<br>LatA 100<br>ms      | 2.983              | No               | ns          | >0.9999             |
| DMSO no<br>stim vs.<br>Jasp no<br>stim     | 2.874              | No               | ns          | >0.9999             |
| DMSO no<br>stim vs.<br>Jasp 100<br>ms      | -95.44             | Yes              | ****        | <0.0001             |
| DMSO 100<br>ms vs.<br>LatA no<br>stim      | 62.63              | Yes              | ****        | <0.0001             |
| DMSO 100<br>ms vs.<br>LatA 100<br>ms       | 59.65              | Yes              | ****        | <0.0001             |
| DMSO 100<br>ms vs.<br>Jasp no<br>stim      | 59.54              | Yes              | ****        | <0.0001             |

|                               |         |     |      |         |
|-------------------------------|---------|-----|------|---------|
| DMSO 100 ms vs. Jasp 100 ms   | -38.77  | Yes | *    | 0.0409  |
| LatA no stim vs. LatA 100 ms  | -2.982  | No  | ns   | >0.9999 |
| LatA no stim vs. Jasp no stim | -3.091  | No  | ns   | >0.9999 |
| LatA no stim vs. Jasp 100 ms  | -101.4  | Yes | **** | <0.0001 |
| LatA 100 ms vs. Jasp no stim  | -0.1082 | No  | ns   | >0.9999 |
| LatA 100 ms vs. Jasp 100 ms   | -98.42  | Yes | **** | <0.0001 |
| Jasp no stim vs. Jasp 100 ms  | -98.31  | Yes | **** | <0.0001 |

**Fig. 2e** Kruskal-Wallis test with Dunn's multiple comparisons test

|                                   |                 | N (culture)   | n (synatic profiles) | mean             | sem      | p values (against no stim control) |
|-----------------------------------|-----------------|---------------|----------------------|------------------|----------|------------------------------------|
| DMSO                              | no stim         | 2             | 237                  | 0.09705          | 0.02188  |                                    |
|                                   | 1 s             | 2             | 207                  | 0.2222           | 0.0313   | 0.0009                             |
| LatA                              | no stim         | 2             | 207                  | 0.01932          | 0.009591 |                                    |
|                                   | 1 s             | 2             | 209                  | 0.01914          | 0.0095   | >0.9999                            |
| Jasp                              | no stim         | 2             | 199                  | 0.05528          | 0.01624  |                                    |
|                                   | 1 s             | 2             | 213                  | 0.1784           | 0.03021  | 0.0097                             |
|                                   |                 |               |                      |                  |          |                                    |
| Dunn's multiple comparison s test | Mean rank diff. | Significa nt? | Summar y             | Adjusted P Value |          |                                    |
| DMSO no stim vs. DMSO 1s          | -75.92          | Yes           | ***                  | 0.0002           |          |                                    |

|                               |        |     |      |         |
|-------------------------------|--------|-----|------|---------|
| DMSO no stim vs. LatA no stim | 44.08  | No  | ns   | 0.1764  |
| DMSO no stim vs. LatA 1s      | 44.2   | No  | ns   | 0.1699  |
| DMSO no stim vs. Jasp no stim | 21.34  | No  | ns   | >0.9999 |
| DMSO no stim vs. Jasp 1 s     | -45.49 | No  | ns   | 0.1321  |
| DMSO 1s vs. LatA no stim      | 120    | Yes | **** | <0.0001 |
| DMSO 1s vs. LatA 1s           | 120.1  | Yes | **** | <0.0001 |
| DMSO 1s vs. Jasp no stim      | 97.26  | Yes | **** | <0.0001 |
| DMSO 1s vs. Jasp 1 s          | 30.43  | No  | ns   | >0.9999 |
| LatA no stim vs. LatA 1s      | 0.117  | No  | ns   | >0.9999 |
| LatA no stim vs. Jasp no stim | -22.74 | No  | ns   | >0.9999 |
| LatA no stim vs. Jasp 1 s     | -89.57 | Yes | **** | <0.0001 |
| LatA 1s vs. Jasp no stim      | -22.86 | No  | ns   | >0.9999 |
| LatA 1s vs. Jasp 1 s          | -89.68 | Yes | **** | <0.0001 |
| Jasp no stim vs. Jasp 1 s     | -66.83 | Yes | **   | 0.0034  |

**Fig. 3d** Mann-Whitney test

|           |         | N<br>(culture) | n<br>(synaptic<br>profiles) | mean    | sem      | p values<br>(against no<br>stim control) |
|-----------|---------|----------------|-----------------------------|---------|----------|------------------------------------------|
| wild type | no stim | 2              | 209                         | 0.00479 | 0.004785 |                                          |
|           | 100 ms  | 2              | 218                         | 0.1147  | 0.0235   | <0.0001                                  |

**Fig. 3f** Kruskal-Wallis test with Dunn's correction

|                      |         | N<br>(culture) | n<br>(synaptic<br>profiles) | mean    | sem     | p values<br>(against no<br>stim control) |
|----------------------|---------|----------------|-----------------------------|---------|---------|------------------------------------------|
| Doc2a <sup>+/+</sup> | no stim | 2              | 243                         | 0.02881 | 0.01075 |                                          |
|                      | 100 ms  | 2              | 212                         | 0.1274  | 0.0239  | 0.0012                                   |
| Doc2a <sup>-/-</sup> | no stim | 2              | 235                         | 0.04681 | 0.01381 |                                          |
|                      | 100 ms  | 2              | 234                         | 0.03846 | 0.01398 | 0.9742                                   |

| Dunn's multiple<br>comparisons<br>test | Mean rank<br>diff. | Significa<br>nt? | Summar<br>y | Adjusted<br>P Value |
|----------------------------------------|--------------------|------------------|-------------|---------------------|
| wt no stim vs.<br>wt 100 ms            | -43.38             | Yes              | ****        | <0.0001             |
| wt no stim vs.<br>doc2a no stim        | -8.299             | No               | ns          | >0.9999             |
| wt no stim vs.<br>doc2a 100 ms         | -2.592             | No               | ns          | >0.9999             |
| wt 100 ms vs.<br>doc2a no stim         | 35.08              | Yes              | **          | 0.003               |
| wt 100 ms vs.<br>doc2a 100 ms          | 40.79              | Yes              | ***         | 0.0003              |
| doc2a no stim<br>vs. doc2a 100<br>ms   | 5.707              | No               | ns          | >0.9999             |

**Fig. 3h** Kruskal-Wallis test with Dunn's correction

|      |         | N<br>(culture) | n<br>(synaptic<br>profiles) | mean    | sem     | p values<br>(against no<br>stim control) |
|------|---------|----------------|-----------------------------|---------|---------|------------------------------------------|
| DMSO | no stim | 2              | 200                         | 0.025   | 0.01107 |                                          |
|      | 100 ms  | 2              | 167                         | 0.1078  | 0.0269  | 0.0012                                   |
| EGTA | no stim | 2              | 201                         | 0       | 0       |                                          |
|      | 100 ms  | 2              | 159                         | 0.02516 | 0.01246 | >0.9999                                  |

| Dunn's multiple<br>comparisons<br>test | Mean rank<br>diff. | Significa<br>nt? | Summar<br>y | Adjusted<br>P Value |
|----------------------------------------|--------------------|------------------|-------------|---------------------|
|----------------------------------------|--------------------|------------------|-------------|---------------------|

|                     |        |     |      |         |
|---------------------|--------|-----|------|---------|
| no stim vs. 100 ms  | -25.82 | Yes | **   | 0.0012  |
| no stim vs. no stim | 9.063  | No  | ns   | >0.9999 |
| no stim vs. 100 ms  | -0.057 | No  | ns   | >0.9999 |
| 100 ms vs. no stim  | 34.88  | Yes | **** | <0.0001 |
| 100 ms vs. 100 ms   | 25.76  | Yes | **   | 0.0027  |
| no stim vs. 100 ms  | -9.119 | No  | ns   | >0.9999 |



**Fig. 4e** Kruskal-Wallis test with Dunn's correction

|           | N (culture) | n (synapse) | minimum | 25%   | median | 75%   | maximum | skewness |
|-----------|-------------|-------------|---------|-------|--------|-------|---------|----------|
| scramble  | 3           | 75          | 108.3   | 219.2 | 374.8  | 661.9 | 1269    | 0.7593   |
| Epsin1 KD | 3           | 66          | 62.49   | 123.8 | 221.4  | 376.5 | 1324    | 1.868    |

**Fig. 4g** Games-Howell's multiple comparisons test

|           |         | N (culture) | n (synaptic profiles) | mean    | sem     | p values (against no stim control) |
|-----------|---------|-------------|-----------------------|---------|---------|------------------------------------|
| scramble  | no stim | 2           | 225                   | 0.02222 | 0.00985 |                                    |
|           | 100 ms  | 2           | 118                   | 0.1356  | 0.03165 | 0.0045                             |
| Epsin1 KD | no stim | 2           | 235                   | 0.00426 | 0.00426 |                                    |
|           | 100 ms  | 2           | 199                   | 0.01005 | 0.00709 | 0.8967                             |

| Games-Howell's multiple comparisons test | Mean Diff. | 95.00% CI of diff.    | Below threshold? | Summary | Adjusted P Value |
|------------------------------------------|------------|-----------------------|------------------|---------|------------------|
| scr no stim vs. scr 100 ms               | -0.1134    | -0.1996 to -0.0271    | Yes              | **      | 0.0045           |
| scr no stim vs. kd no stim               | 0.01797    | -0.009748 to 0.041695 | No               | ns      | 0.3389           |
| scr no stim vs. kd 100 ms                | 0.01217    | -0.01914 to 0.04348   | No               | ns      | 0.7477           |
| scr 100 ms vs. kd no stim                | 0.1313     | 0.04815 to 0.21445    | Yes              | ***     | 0.0004           |
| scr 100 ms vs. kd 100 ms                 | 0.1255     | 0.04112 to 0.2100     | Yes              | ***     | 0.001            |
| kd no stim vs. kd 100 ms                 | -0.005795  | -0.02714 to 0.01565   | No               | ns      | 0.8967           |

**Fig. 4h** Games-Howell's multiple comparisons test

|          |         | N (culture) | n (synaptic profiles) | mean    | sem     | p values (against no stim control) |
|----------|---------|-------------|-----------------------|---------|---------|------------------------------------|
| scramble | no stim | 2           | 225                   | 0.03556 | 0.01237 |                                    |

|           |         |   |     |         |         |         |
|-----------|---------|---|-----|---------|---------|---------|
|           | 1 s     | 2 | 127 | 0.3071  | 0.04543 | <0.0001 |
| Epsin1 KD | no stim | 2 | 235 | 0.08085 | 0.02152 |         |
|           | 1 s     | 2 | 232 | 0.0819  | 0.02    | >0.9999 |

| Games-Howell's multiple comparison s test | Mean Diff. | 95.00% CI of diff. | Below threshold? | Summary | Adjusted P Value |
|-------------------------------------------|------------|--------------------|------------------|---------|------------------|
| scr no stim vs. scr 1 s                   | -0.2715    | -0.3939 to -       | Yes              | ****    | <0.0001          |
| scr no stim vs. kd no stim                | -0.0453    | -0.1094 to 0.0187  | No               | ns      | 0.2633           |
| scr no stim vs. kd 1 s                    | -0.04634   | -0.1070 to         | No               | ns      | 0.2011           |
| scr 1 s vs. kd no stim                    | 0.2262     | 0.0959 1 to        | Yes              | ****    | <0.0001          |
| scr 1 s vs. kd 1 s                        | 0.2252     | 0.0964 4 to        | Yes              | ****    | <0.0001          |
| kd no stim vs. kd 1 s                     | -0.001045  | - 0.0768           | No               | ns      | >0.9999          |
